# Supplementary material for: Leaf Area Index identified as a major source of variability in modelled CO 2 fertilization
Source: Copernicus journal article supplement (doi:10.5194/bg-2018-213), 2018-05-08
Supplement: Supplementary file 1 [file bg-2018-213-supplement.pdf]

## Supplementary materials

**Table S1 Prescribed minimum LAI and maximum LAI values for C<sub>3</sub> plants in CABLE. Abbreviations are the same as Figure 1.**

| PFT    | LAImin | LAImax |
|--------|--------|--------|
| ENF    | 0.5    | 7      |
| EBF    | 1      | 7      |
| DNF    | 0.35   | 7      |
| DBF    | 0.35   | 7      |
| SHB    | 0.1    | 3      |
| C3GRAS | 0.1    | 3      |
| TUN    | 0.1    | 3      |

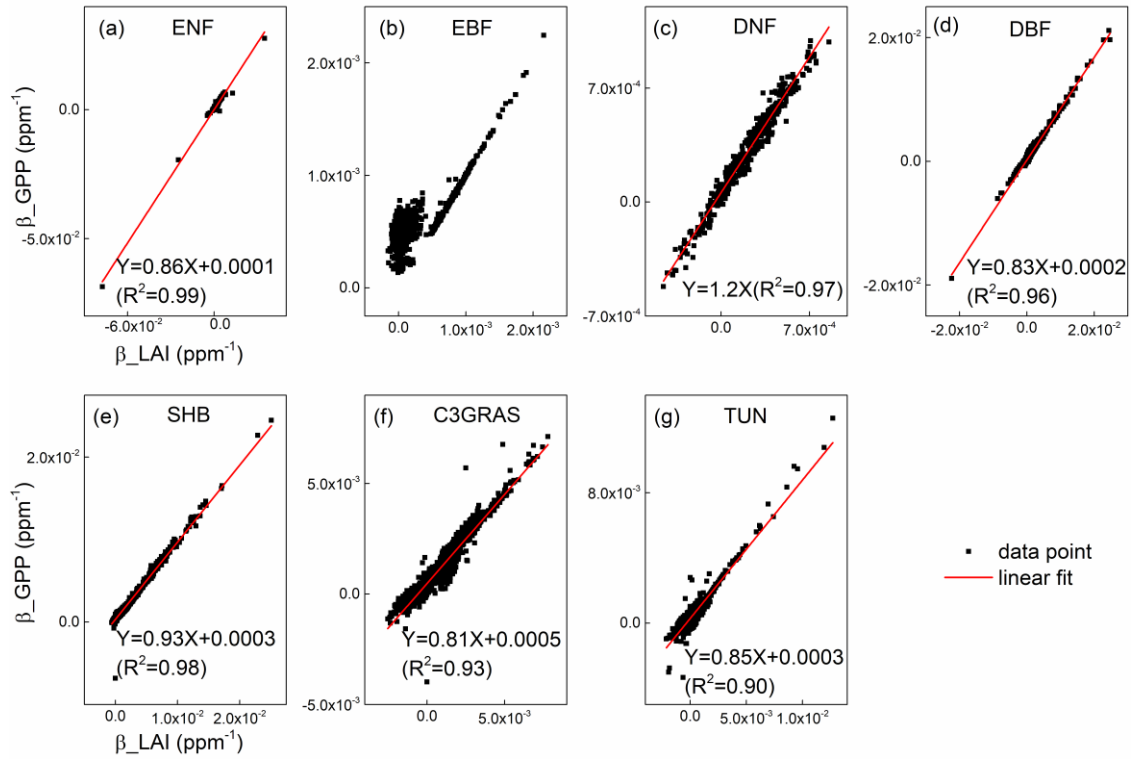

10

**Figure S1 Correlations between  $\beta_{GPP}$  and  $\beta_{LAI}$  for patches within each C<sub>3</sub> vegetation type. Plants of the same type but at different locations show diverse responses of GPP primarily because the sensitivities of LAI vary. The relationships are all significant at the 0.01 level.**

15

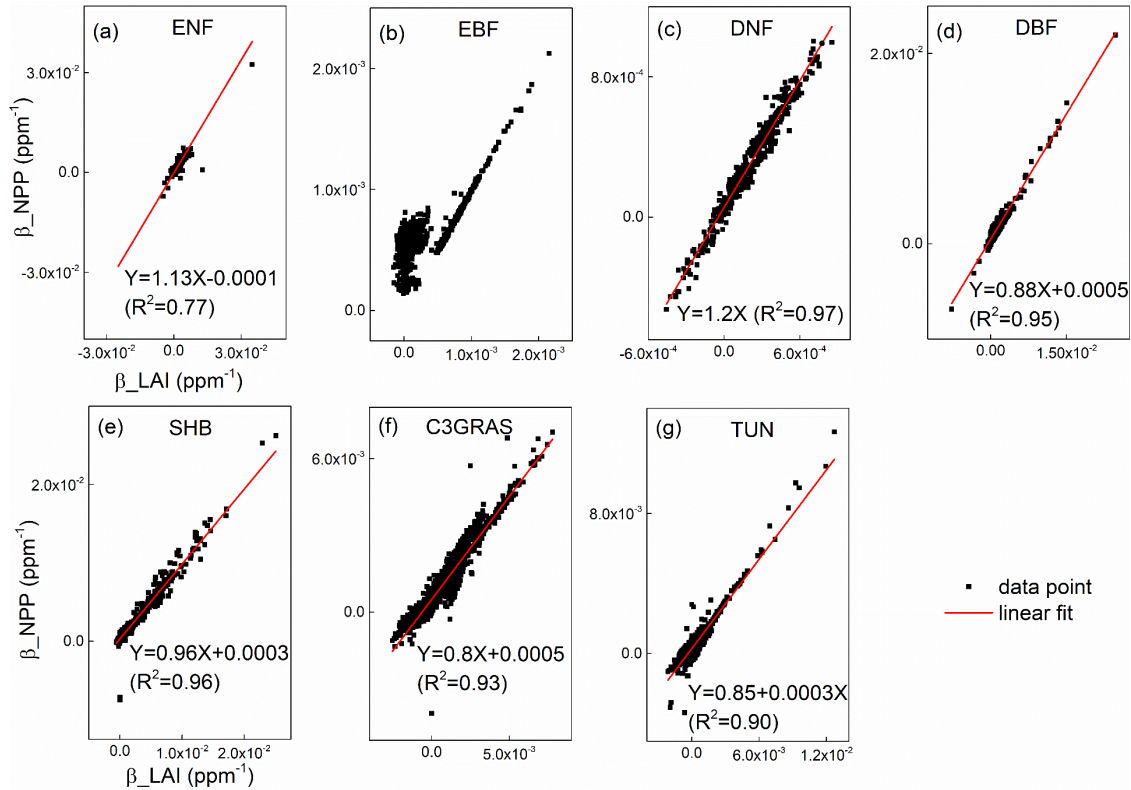

20 **Figure S2 Correlations between  $\beta_{NPP}$  and  $\beta_{LAI}$  for patches within each C<sub>3</sub> vegetation type. Plants of the same type but at different locations show diverse responses of NPP primarily because the sensitivities of LAI vary. The relationships are all significant at the 0.01 level.**

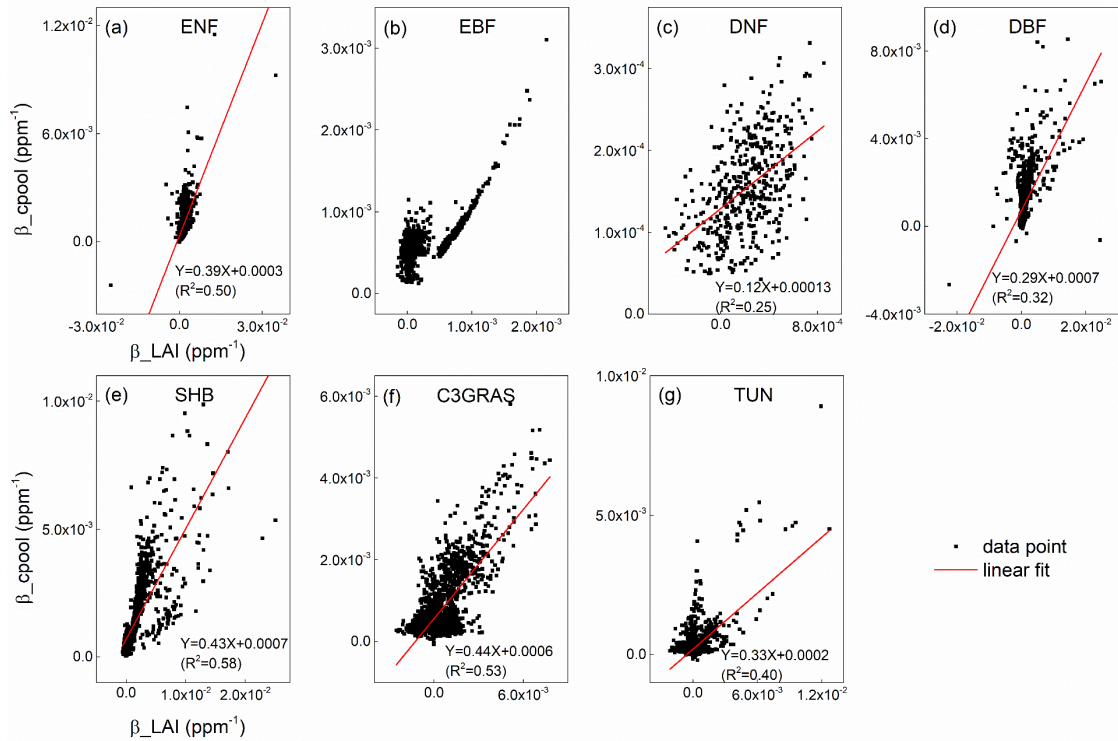

25

**Figure S3 Correlations between  $\beta_{cpool}$  and  $\beta_{LAI}$  for patches within each C<sub>3</sub> vegetation type. The correlations between  $\beta_{cpool}$  and  $\beta_{LAI}$  are lower than those between  $\beta_{NPP}$  and  $\beta_{LAI}$ . The relationships are all significant at the 0.01 level.**

30

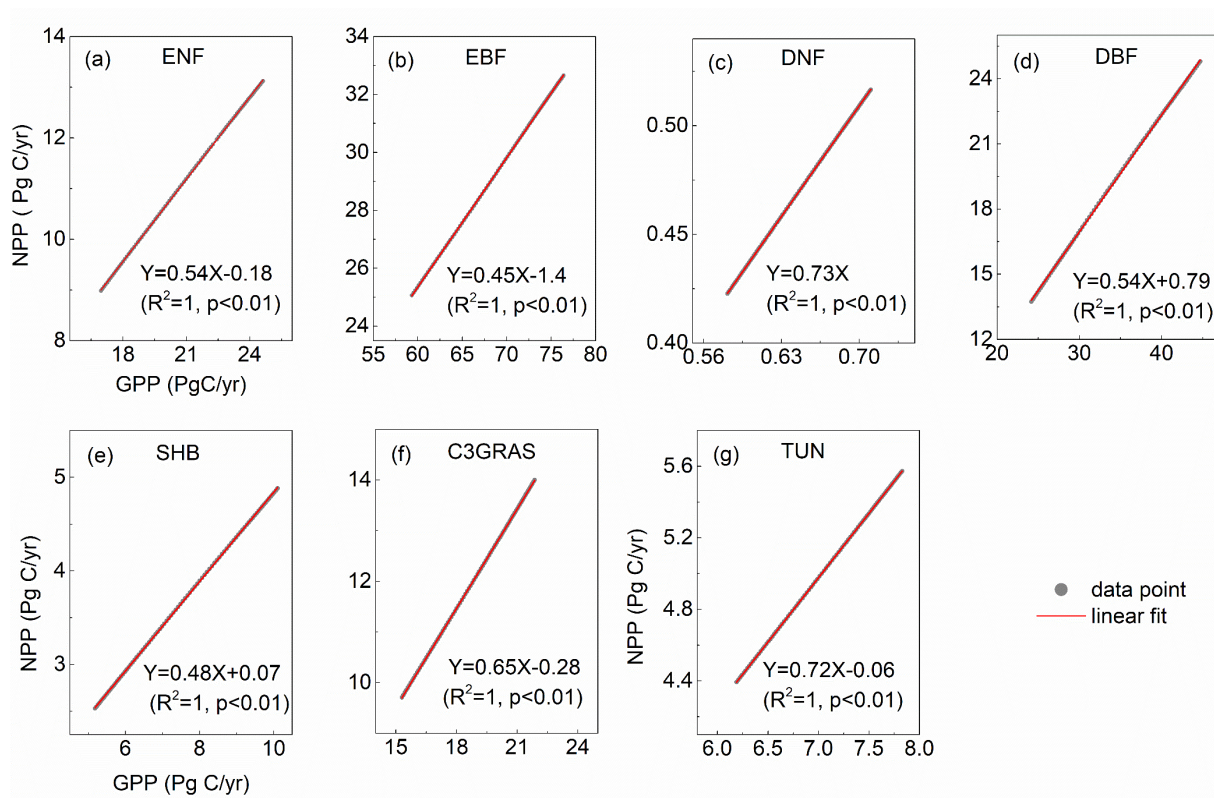

**Figure S4 Correlations between NPP and GPP with eCO<sub>2</sub> from 2011 to 2100 for C<sub>3</sub> plants in CABLE. Abbreviations are the same as Figure 1.**

35

40

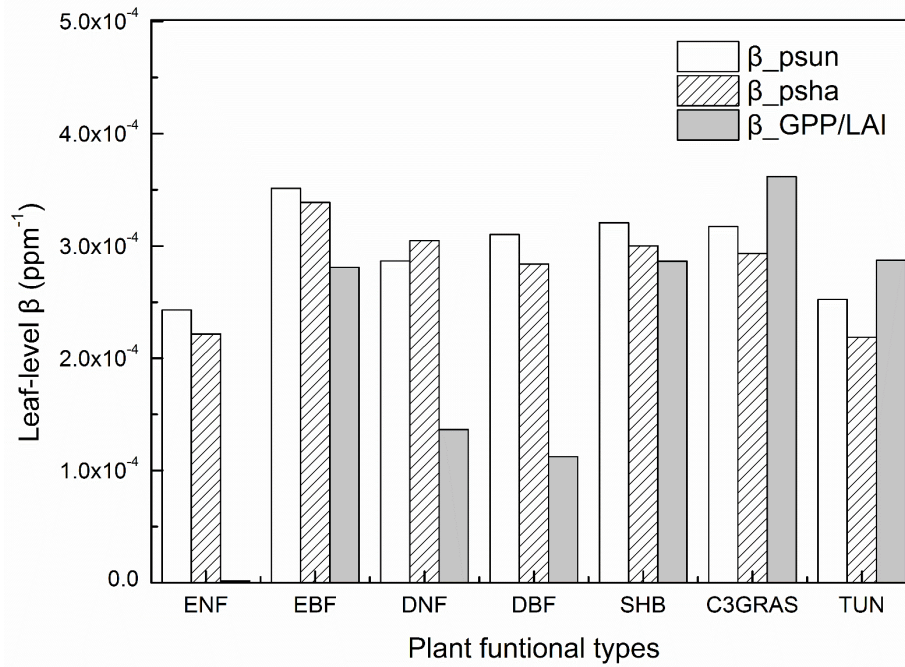

45

**Figure S5 Comparison between leaf level  $\beta$  calculated through biochemical parameters  $C_i$  and  $\Gamma_x$  for sunlit leaf ( $\beta_{psun}$ ) and shaded leaf ( $\beta_{psha}$ ) and sensitivity of GPP/LAI ( $\beta_{GPP/LAI}$ ) for different C<sub>3</sub> plants at the year 2056 in CABLE. Abbreviations are the same as Figure 1.**

50

55

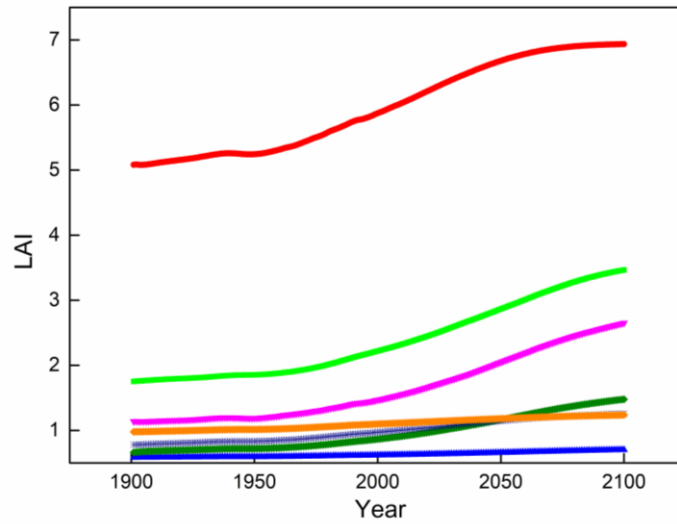

■ ENF ■ EBF ▲ DNF ▼ DBF ◆ SHB \* C3GRAS ◆ TUN

60

**Figure S6 Temporal trends of yearly average LAI in response to eCO<sub>2</sub> for C<sub>3</sub> plants from 1901 to 2100. LAI value of evergreen broadleaf forest increases with time but gradually saturates at the prescribed maximum value. LAI values of other plants also increase but are far below the prescribed maximum values at 2100. Abbreviations and symbols are the same as Figure 1.**

65

70

75
